# Supplementary material for: Silencing the Autophagy-Related Genes ATG3 and ATG9 Promotes SRBSDV Propagation and Transmission in Sogatella furcifera
Source: MDPI journal article supplement (doi:10.3390/insects13040394), 2022-04-18

**Table S1.** The GenBank accession numbers of the analyzed ATG3 sequences in construction of phylogenetic tree.

|           | Species name                    | Accession numbers |
|-----------|---------------------------------|-------------------|
| <b>1</b>  | <i>Drosophila melanogaster</i>  | NP_649059         |
| <b>2</b>  | <i>Apis mellifera</i>           | XP_624693         |
| <b>3</b>  | <i>Tenebrio molitor</i>         | AHC00664          |
| <b>4</b>  | <i>Aedes aegypti</i>            | XP_001657463      |
| <b>5</b>  | <i>Helicoverpa armigera</i>     | XP_021197073      |
| <b>6</b>  | <i>Bombyx mori</i>              | NP_001135961      |
| <b>7</b>  | <i>Tribolium castaneum</i>      | EFA03061          |
| <b>8</b>  | <i>Nilaparvata lugens</i>       | AWW05868          |
| <b>9</b>  | <i>Locusta migratoria</i>       | ATX63055          |
| <b>10</b> | <i>Manduca sexta</i>            | XP_037301759      |
| <b>11</b> | <i>Bemisia tabaci</i>           | XP_018898322      |
| <b>12</b> | <i>Cryptotermes secundus</i>    | PNF36327          |
| <b>13</b> | <i>Bactrocera dorsalis</i>      | JAC54275          |
| <b>14</b> | <i>Anoplophora_glabripennis</i> | JAB62976.1        |

**Table S2.** The GenBank accession numbers of the analyzed ATG9 sequences in construction of phylogenetic tree.

|          | <b>Species name</b>               | <b>Accession numbers</b> |
|----------|-----------------------------------|--------------------------|
| <b>1</b> | <i>Drosophila melanogaster</i>    | NP_001261023             |
| <b>2</b> | <i>Apis mellifera</i>             | XP_395581.4              |
| <b>3</b> | <i>Aedes albopictus</i>           | XP_001657463             |
| <b>4</b> | <i>Nilaparvata lugens</i>         | AWW05881.1               |
| <b>5</b> | <i>Locusta migratoria</i>         | ATX63059                 |
| <b>6</b> | <i>Frankliniella occidentalis</i> | KAE8750316               |
| <b>7</b> | <i>Nasonia vitripennis</i>        | XP_032457190             |
| <b>8</b> | <i>Heortia vitessoides</i>        | QNO58549.1               |

**Figure S1.** Agarose gel electrophoresis of dsRNA sequences of *S. furcifera*

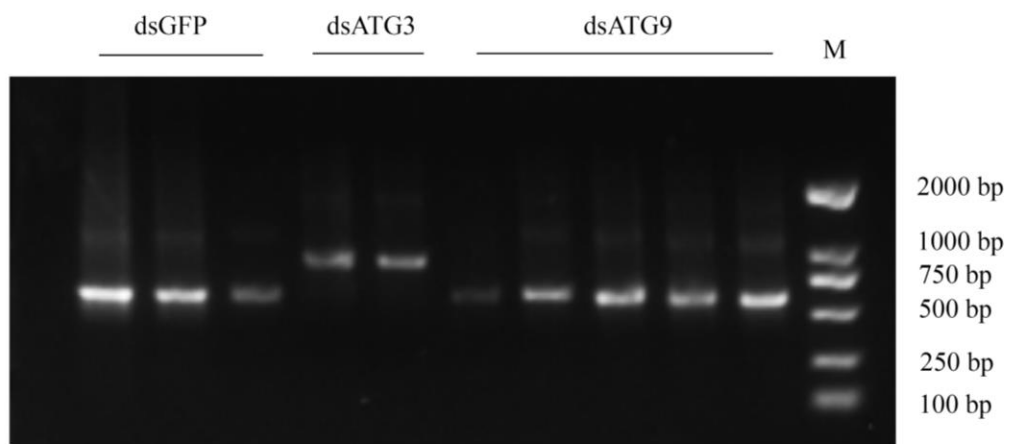

Supplement: s1 [file s1]
